# Supplementary material
Source: PubMed Central journal article supplement (PMC4737647)
Supplement: NIHMS753566-supplement-Supplemental_Data.pdf [file NIHMS753566-supplement-Supplemental_Data.pdf]

**Supplemental Table 1. Participating institutions and institutional primary investigators (PIs)**

| Institution                                 | Primary Investigator(s)                     |
|---------------------------------------------|---------------------------------------------|
| Hospital of the University of Pennsylvania  | Daniel Pryma, MD; Julia Tchou, MD           |
| Washington University Medical School        | Farrokh Dehdashti, MD                       |
| Thomas Jefferson University Hospital        | Charles Intenzo, MD                         |
| University of North Carolina                | Amir Khandani, MD                           |
| University of Washington                    | David Mankoff, MD, PhD; Jennifer Specht, MD |
| Wake Forest University                      | Akiva Mintz, MD, PhD                        |
| Medical University of South Carolina        | Amy Campbell, MD                            |
| Virginia Commonwealth University            | Paul Jolles, MD                             |
| Scottsdale Medical Imaging, LTD             | Ronald Korm, MD, PhD                        |
| University of Arkansas for Medical Sciences | Twyla Bartel, DO                            |
| University of Southern California           | Linda Hovanessian-Larsen, MD                |
| University of Wisconsin Hospital            | Lance Hall, MD                              |
| Morton Plant Mease Health Care, Inc.        | John Miliziano, MD                          |
| Excel Diagnostics Imaging Clinics           | Ebrahim S. Delpassand, MD                   |
| Wayne State University                      | Anthony Shields, MD                         |
| Mount Sinai Medical Center                  | Lale Kostakoglu, MD                         |
| Fox Chase Cancer Center                     | Michael Yu, MD                              |

**Supplemental Table 2. Eligibility status**

| <b>Reason for ineligibility</b>                       | <b>Number</b> | <b>%</b> | <b>Cumulative Frequency</b> |
|-------------------------------------------------------|---------------|----------|-----------------------------|
|                                                       | 51            | 56.67    | 51                          |
| <b>Ineligible (Not eligible per medical history)</b>  | 1             | 1.11     | 52                          |
| <b>Ineligible (Metastatic disease at study entry)</b> | 2             | 2.22     | 54                          |
| <b>Amendment 4</b>                                    | 5             | 5.56     | 59                          |
| <b>Patient withdrew</b>                               | 10            | 11.11    | 69                          |
| <b>Complicating or intercurrent illness</b>           | 1             | 1.11     | 70                          |
| <b>FLT1 not completed</b>                             | 4             | 4.44     | 74                          |
| <b>First cycle chemotherapy not initiated</b>         | 2             | 2.22     | 76                          |
| <b>FLT2 not completed</b>                             | 5             | 5.56     | 81                          |
| <b>Second cycle chemotherapy not initiated</b>        | 1             | 1.11     | 82                          |
| <b>Chemo timing: FLT2 after cycle-2 initiated</b>     | 7             | 7.78     | 89                          |
| <b>No pathology data</b>                              | 1             | 1.11     | 90                          |

**Supplemental Table 3. Flow Diagram from the enrollment to follow-up**

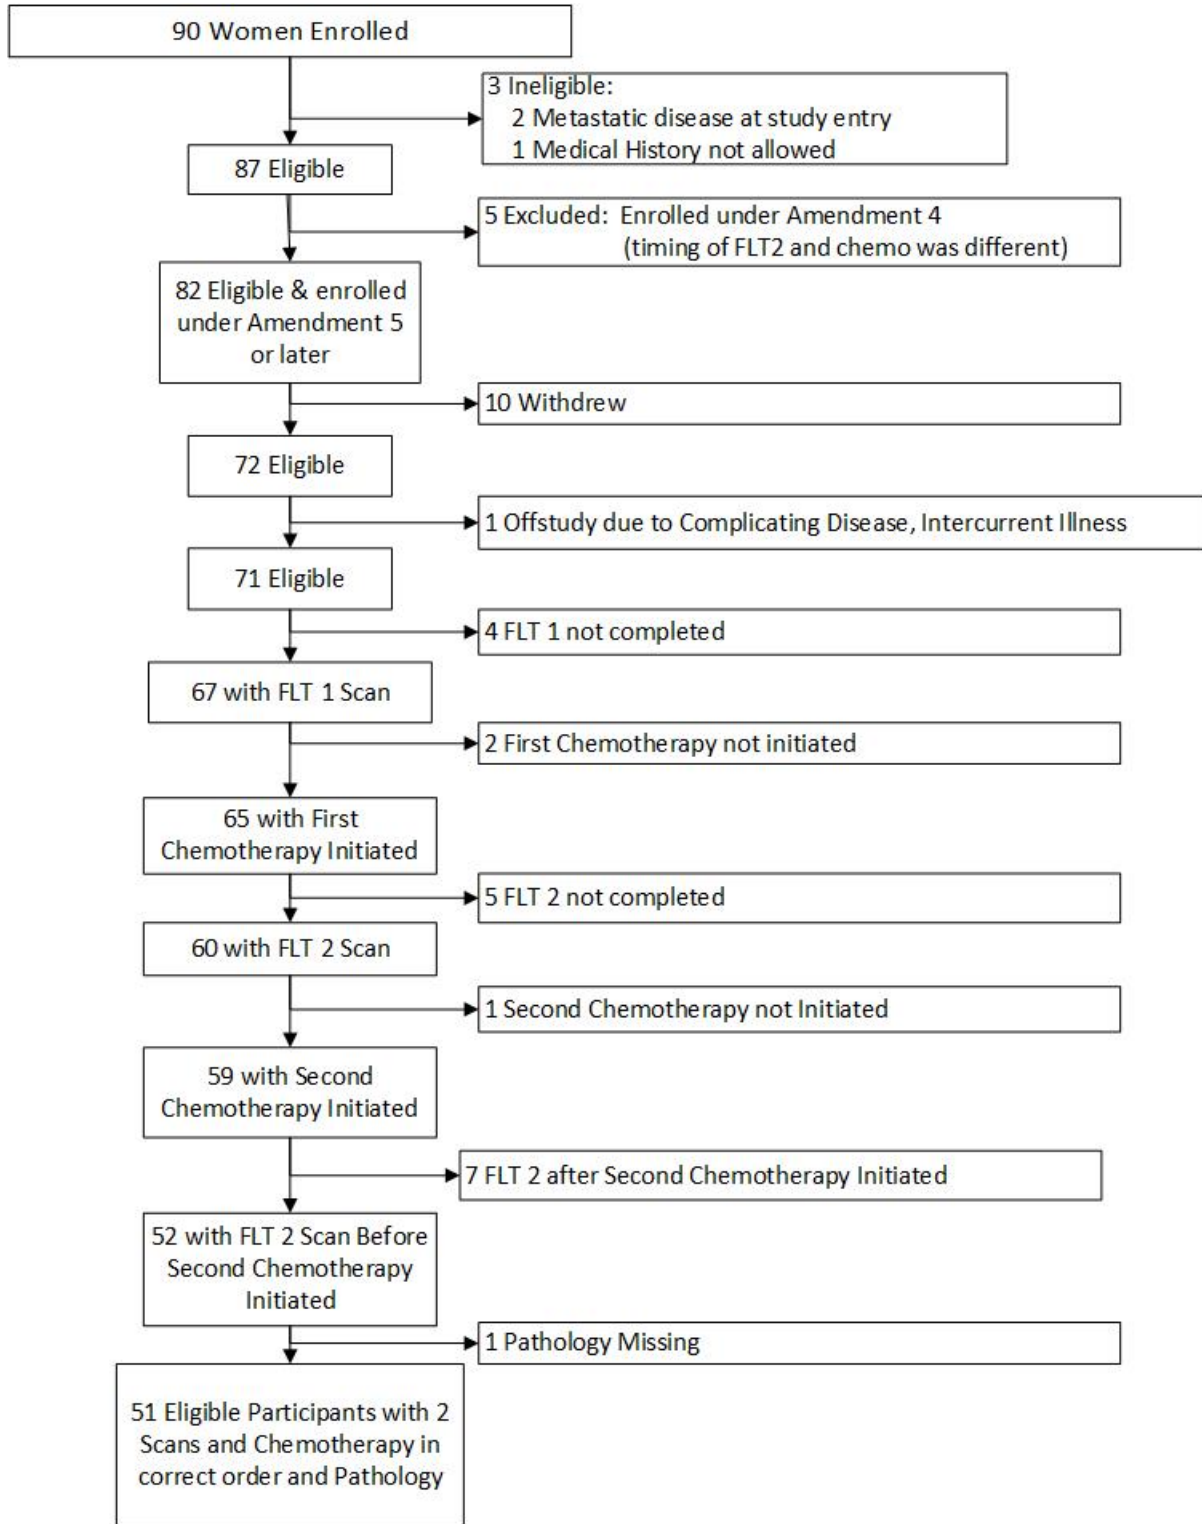

**Supplemental Table 4. Chemotherapy regimens used in this study**

|                  |
|------------------|
|                  |
| CYCKIOGISOGANUDE |
| FLUOROURACIL     |
| ABRAXANE         |
| ALOXI            |
| AVASTIN          |
| BENADRYL         |
| BEVACIZUMAB      |
| CAPECITABINE     |
| CARBOPLATIN      |
| CYCLOPHOSPHAMIDE |
| CYTOXAN          |
| DOCETAXEL        |
| DOXORUBICIN      |
| EPIRUBICIN       |
| FLUOROURACIL     |
| HERCEPTIN        |
| LAPATANIB        |
| PACLITAXEL       |
| TAXOL            |
| TAXOTERE         |
| TRASTUZUMAB      |

**Supplemental Table 5. Summary statistics of Uptake time from three serial scans.**

|      | FLT-1 | FLT-2 | FLT-3 | $\Delta 1to2$ | $\Delta 1to3$ |
|------|-------|-------|-------|---------------|---------------|
| Mean | 71    | 70    | 70    | 0             | 1             |
| SD   | 8.7   | 7.4   | 6.9   | 7.6           | 10.6          |
| Min  | 51    | 55    | 60    | -23           | -32           |
| Max  | 101   | 92    | 92    | 29            | 36            |

**Supplemental Table 6. Summary of SUVs and Ki-67 data from different time points**

| Time point                     | Aim                     | SUV Parameter | pCR Status  | Number of Evaluable Participants | Range      | Mean   | SD   | P value+ |
|--------------------------------|-------------------------|---------------|-------------|----------------------------------|------------|--------|------|----------|
| Baseline (FLT1)                | For Primary Aim         | SUVmax        | all data    | 51                               | 0.87-11.76 | 5.65   | 2.97 | 0.62     |
|                                |                         |               | pCR         | 9                                | 1.86-11.76 | 6.09   | 3.17 |          |
|                                |                         |               | no-pCR      | 42                               | 0.87-11.68 | 5.55   | 2.95 |          |
|                                |                         | SUVpeak       | all data    | 51                               | 0.71-10.65 | 4.57   | 2.53 | 0.74     |
|                                |                         |               | pCR         | 9                                | 1.52-10.65 | 4.97   | 2.96 |          |
|                                |                         |               | no-pCR      | 42                               | 0.71-9.64  | 4.49   | 2.46 |          |
|                                |                         | SUVmean       | all data    | 51                               | 0.67-9.53  | 4.20   | 2.38 | 0.62     |
|                                |                         |               | pCR         | 9                                | 1.27-9.53  | 4.71   | 2.81 |          |
|                                |                         |               | no-pCR      | 42                               | 0.67-9.1   | 4.09   | 2.30 |          |
|                                | For FLT3 Secondary Aim  | SUVmax        | all data    | 43                               | 0.87-11.76 | 5.78   | 3.09 | 0.89     |
|                                |                         |               | pCR         | 8                                | 1.86-11.76 | 5.99   | 3.37 |          |
|                                |                         |               | no-pCR      | 35                               | 0.87-11.68 | 5.74   | 3.07 |          |
|                                |                         | SUVpeak       | all data    | 43                               | 0.71-10.65 | 4.69   | 2.65 | 0.96     |
|                                |                         |               | pCR         | 8                                | 1.52-10.65 | 4.94   | 3.16 |          |
|                                |                         |               | no-pCR      | 35                               | 0.71-9.64  | 4.64   | 2.57 |          |
|                                |                         | SUVmean       | all data    | 43                               | 0.67-9.53  | 4.29   | 2.50 | 0.84     |
|                                |                         |               | pCR         | 8                                | 1.27-9.53  | 4.56   | 2.97 |          |
|                                |                         |               | no-pCR      | 35                               | 0.67-9.1   | 4.23   | 2.43 |          |
|                                | For Ki-67 Secondary Aim | SUVmax        | all data    | 72*                              | 0.87-16.36 | 5.71   | 3.20 | 0.59     |
|                                |                         |               | pCR         | 12                               | 1.86-11.76 | 6.17   | 3.30 |          |
|                                |                         |               | no-pCR      | 49                               | 0.87-11.68 | 5.60   | 2.96 |          |
|                                |                         |               | Missing-pCR | 11                               | 1.42-16.36 | 5.67   | 4.30 |          |
|                                |                         | SUVpeak       | all data    | 72                               | 0.71-13.34 | 4.68   | 2.71 | 0.59     |
|                                |                         |               | pCR         | 12                               | 1.52-10.65 | 5.22   | 3.17 |          |
| no-pCR                         |                         |               | 49          | 0.71-9.64                        | 4.54       | 2.45   |      |          |
| Missing-pCR                    |                         |               | 11          | 1.31-13.34                       | 4.74       | 3.43   |      |          |
| SUVmean                        |                         | all data      | 72          | 0.67-10.84                       | 4.23       | 2.45   | 0.51 |          |
|                                |                         | pCR           | 12          | 1.27-9.77                        | 4.90       | 3.01   |      |          |
|                                |                         | no-pCR        | 49          | 0.67-9.1                         | 4.10       | 2.26   |      |          |
|                                |                         | Missing-pCR   | 11          | 1.17-10.84                       | 4.05       | 2.74   |      |          |
| KI-67                          |                         | all data      | 72*         | 15-944                           | 331.74     | 233.27 | 0.86 |          |
|                                |                         | pCR           | 12          | 89-701                           | 350.75     | 233.46 |      |          |
|                                |                         | no-pCR        | 49          | 15-944                           | 330.47     | 222.59 |      |          |
|                                | Missing-pCR             | 11            | 24-883      | 316.60                           | 296.48     |        |      |          |
| After one cycle of NAC (FLT2)  | For Primary Aim         | SUVmax        | all data    | 51                               | 0.44-8.29  | 3.21   | 1.84 | 0.35     |
|                                |                         |               | pCR         | 9                                | 0.92-8.29  | 3.00   | 2.54 |          |
|                                |                         |               | no-pCR      | 42                               | 0.44-6.43  | 3.25   | 1.69 |          |
|                                |                         | SUVpeak       | all data    | 51                               | 0.34-7.41  | 2.62   | 1.64 | 0.31     |
|                                |                         |               | pCR         | 9                                | 0.73-7.41  | 2.39   | 2.18 |          |
|                                |                         |               | no-pCR      | 42                               | 0.34-6.17  | 2.67   | 1.53 |          |
|                                | SUVmean                 | all data      | 51          | 0.26-6.63                        | 2.37       | 1.48   | 0.29 |          |
|                                |                         | pCR           | 9           | 0.62-6.63                        | 2.17       | 1.95   |      |          |
|                                |                         | no-pCR        | 42          | 0.26-5.15                        | 2.41       | 1.38   |      |          |
| After completion of NAC (FLT3) | For FLT3 Secondary Aim  | SUVmax        | all data    | 43                               | 0.33-7.46  | 1.74   | 1.81 | 0.0047   |
|                                |                         |               | pCR         | 8                                | 0.37-1.08  | 0.62   | 0.27 |          |
|                                |                         |               | no-pCR      | 35                               | 0.33-7.46  | 2.00   | 1.92 |          |

| Time point | Aim                     | SUV Parameter | pCR Status | Number of Evaluable Participants | Range     | Mean   | SD     | P value+ |
|------------|-------------------------|---------------|------------|----------------------------------|-----------|--------|--------|----------|
|            | For Ki-67 Secondary Aim | SUVpeak       | all data   | 43                               | 0.19-5.5  | 1.35   | 1.42   | 0.0038   |
|            |                         |               | pCR        | 8                                | 0.19-0.89 | 0.45   | 0.23   |          |
|            |                         |               | no-pCR     | 35                               | 0.25-5.5  | 1.56   | 1.50   |          |
|            |                         | SUVmean       | all data   | 43                               | 0.21-5.18 | 1.17   | 1.30   | 0.0053   |
|            |                         |               | pCR        | 8                                | 0.24-0.8  | 0.41   | 0.18   |          |
|            |                         |               | no-pCR     | 35                               | 0.21-5.18 | 1.35   | 1.38   |          |
|            |                         | SUVmax        | all data   | 43                               | 0.33-7.46 | 1.88   | 1.88   | 0.0020   |
|            |                         |               | pCR        | 8                                | 0.37-1.08 | 0.62   | 0.27   |          |
|            |                         |               | no-pCR     | 35                               | 0.33-7.46 | 2.17   | 1.98   |          |
|            | SUVpeak                 | all data      | 43         | 0.19-5.5                         | 1.47      | 1.47   | 0.0018 |          |
|            |                         | pCR           | 8          | 0.19-0.89                        | 0.45      | 0.23   |        |          |
|            |                         | no-pCR        | 35         | 0.25-5.5                         | 1.70      | 1.54   |        |          |
|            | SUVmean                 | all data      | 43         | 0.21-5.18                        | 1.24      | 1.31   | 0.0026 |          |
|            |                         | pCR           | 8          | 0.24-0.8                         | 0.41      | 0.18   |        |          |
|            |                         | no-pCR        | 35         | 0.21-5.18                        | 1.43      | 1.38   |        |          |
|            | Ki-67                   | all data      | 43         | 0-738                            | 184.14    | 220.16 | <0.001 |          |
|            |                         | pCR           | 8          | 0-0                              | 0.00      | 0.00   |        |          |
|            |                         | no-pCR        | 35         | 0-738                            | 226.23    | 223.77 |        |          |

\*One participant did not have FLT1 SUV data

+Two-sided exact p value from Wilcoxon two-sample test

**Supplemental Table 7. Distributions of baseline SUV and Ki-67 for secondary aims**

| Time point      | Aim                    | Parameter Tested | pCR Status  | Number of Evaluable Participants | Range      | Mean   | SD     | P value+ |
|-----------------|------------------------|------------------|-------------|----------------------------------|------------|--------|--------|----------|
| Baseline (FLT1) | FLT3<br>Secondary Aim  | SUVmax           | all data    | 43                               | 0.87-11.76 | 5.78   | 3.09   |          |
|                 |                        |                  | pCR         | 8                                | 1.86-11.76 | 5.99   | 3.37   | 0.89     |
|                 |                        |                  | no-pCR      | 35                               | 0.87-11.68 | 5.74   | 3.07   |          |
|                 | Ki-67<br>Secondary Aim | SUVmax           | all data    | 72*                              | 0.87-16.36 | 5.71   | 3.20   |          |
|                 |                        |                  | pCR         | 12                               | 1.86-11.76 | 6.17   | 3.30   | 0.59     |
|                 |                        |                  | no-pCR      | 49                               | 0.87-11.68 | 5.60   | 2.96   |          |
|                 |                        |                  | Missing-pCR | 11                               | 1.42-16.36 | 5.67   | 4.30   |          |
|                 |                        | Ki-67            | all data    | 72*                              | 15-944     | 331.74 | 233.27 |          |
|                 |                        |                  | pCR         | 12                               | 89-701     | 350.75 | 233.46 | 0.86     |
|                 |                        |                  | no-pCR      | 49                               | 15-944     | 330.47 | 222.59 |          |
|                 |                        |                  | Missing-pCR | 11                               | 24-883     | 316.60 | 296.48 |          |
|                 |                        |                  | no-pCR      | 35                               | 0-738      | 226.23 | 223.77 |          |

\*One Participant did not have FLT1 SUV measurement.

+Two-sided exact p value from Wilcoxon two-sample test.



**Supplemental Table 8. Distributional Summary of SUVs by time point and lymph node status at surgery**

| Time point                     | SUV Parameter | Lymph Node Status <sup>+</sup> | Number of Evaluable Patients | Range     | Mean (SD) | P value** |
|--------------------------------|---------------|--------------------------------|------------------------------|-----------|-----------|-----------|
| Baseline (FLT1)                | SUVmax        | ALL DATA                       | 38                           | 1.1-20.0  | 5.9 (3.9) | 0.12      |
|                                |               | 0 POSITIVE NODES               | 14                           | 1.1-11.3  | 4.4 (3.0) |           |
|                                |               | 1~3 POSITIVE NODE(S)           | 15                           | 2.0-14.7  | 6.6 (3.6) |           |
|                                |               | >3 POSITIVE NODE(S)            | 9                            | 3.0--19.9 | 7.23(5.1) |           |
| After one cycle of NAC (FLT2)  | SUVmax        | ALL DATA                       | 38                           | 0.7-14.7  | 3.1 (2.7) | 0.062     |
|                                |               | 0 POSITIVE NODES               | 14                           | 0.7-6.7   | 2.0 (1.8) |           |
|                                |               | 1~3 POSITIVE NODE(S)           | 15                           | 0.9-14.7  | 3.9 (3.6) |           |
|                                |               | >3 POSITIVE NODE(S)            | 9                            | 1.0-7.3   | 3.5 (1.8) |           |
| After completion of NAC (FLT3) | SUVmax        | ALL DATA                       | 30                           | 0.2-6.1   | 1.3 (1.2) | 0.11      |
|                                |               | 0 POSITIVE NODES               | 11                           | 0.4-1.5   | 0.8 (0.4) |           |
|                                |               | 1~3 POSITIVE NODE(S)           | 13                           | 0.2-2.9   | 1.23(0.7) |           |
|                                |               | >3 POSITIVE NODE(S)            | 6                            | 0.5-6.1   | 2.5 (2.2) |           |

SUV, standardized uptake value; NAC, neoadjuvant chemotherapy ; <sup>+</sup>Lymph Node Status at Surgery; \*\*two-sided p value from Kruskal-Wallis one-way ANOVA

**Supplemental Table 9. Distributional Summary of SUV differences by time points and lymph node status at surgery**

| Time point                    | Lymph Node Status <sup>+</sup> | Number of Evaluable Patients | Range      | Mean (SD)   | Two-sided p <sup>**</sup> |
|-------------------------------|--------------------------------|------------------------------|------------|-------------|---------------------------|
| %SUV <sub>max FLT1-FLT2</sub> | ALL DATA                       | 38                           | -5.0-88.5  | 44.9 (26.0) |                           |
|                               | 0 POSITIVE NODES               | 14                           | -5.0-88.5  | 47.7 (29.0) | 0.86                      |
|                               | 1~3 POSITIVE NODE(S)           | 15                           | 0.1-88.2   | 43.8 (23.8) |                           |
|                               | 3+ POSITIVE NODE(S)            | 9                            | -2.9-86.4  | 42.6 (27.4) |                           |
| %SUV <sub>max FLT1-FLT3</sub> | ALL DATA                       | 30                           | -35.1-93.8 | 71.4 (29.1) |                           |
|                               | 0 POSITIVE NODES               | 11                           | -35.1-93.8 | 65.2 (42.2) | 0.67                      |
|                               | 1~3 POSITIVE NODE(S)           | 13                           | 23.6-91.6  | 77.6 (18.1) |                           |
|                               | 3+ POSITIVE NODE(S)            | 6                            | 42.9-89.3  | 69.5 (19.5) |                           |

SUV, standardized uptake value; NAC, neoadjuvant chemotherapy ; \*Lymph Node Status at Surgery; \*\*two-sided p value from Kruskal-Wallis one-way ANOVA

**Supplemental Table 10. Distributional Summary of SUVs by time point and residual cancer burden**

| Time point                     | SUV Parameter | RCB Status | Number of Evaluable Patients | Range    | Mean (SD) | P value* |
|--------------------------------|---------------|------------|------------------------------|----------|-----------|----------|
| Baseline (FLT1)                | SUVmax        | ALL DATA   | 35                           | 0.9-11.8 | 5.9 (3.2) | 0.66     |
|                                |               | RCB 0,I    | 14                           | 1.9-11.8 | 6.2 (2.9) |          |
|                                |               | RCB II,III | 21                           | 0.9-11.7 | 5.8 (3.5) |          |
| After one cycle of NAC (FLT2)  | SUVmax        | ALL DATA   | 35                           | 0.4-8.3  | 3.3 (2.0) | 0.86     |
|                                |               | RCB 0,I    | 14                           | 0.9-8.3  | 3.5 (2.3) |          |
|                                |               | RCB II,III | 21                           | 0.4-6.4  | 3.2 (1.9) |          |
| After completion of NAC (FLT3) | SUVmax        | ALL DATA   | 31                           | 0.3-6.4  | 1.8 (1.8) | 0.010    |
|                                |               | RCB 0,I    | 11                           | 0.4-1.2  | 0.7 (0.3) |          |
|                                |               | RCB II,III | 20                           | 0.3-6.4  | 2.4 (2.0) |          |

SUV, standardized uptake value; RCB, residual cancer burden; NAC, neoadjuvant chemotherapy ; \*two-sided exact p value from Wilcoxon two-sample test

**Supplemental Table 11. Distributional Summary of SUV differences between time points by residual cancer burden**

| Difference                    | RCB Status | Number of Evaluable Patients | Range      | Mean (SD)   | P value* |
|-------------------------------|------------|------------------------------|------------|-------------|----------|
| %SUV <sub>max FLT1-FLT2</sub> | ALL DATA   | 35                           | -13.8-84.3 | 40.4 (24.1) | 0.56     |
|                               | RCB 0,I    | 14                           | -1.7-84.3  | 43.6 (24.0) |          |
|                               | RCB II,III | 21                           | -13.8-83.3 | 38.3 (24.5) |          |
| %SUV <sub>max FLT1-FLT3</sub> | ALL DATA   | 31                           | 10.4-96.1  | 66.0 (25.7) | <0.001   |
|                               | RCB 0,I    | 11                           | 74.5-96.1  | 87.3 (6.4)  |          |
|                               | RCB II,III | 20                           | 10.4-95.1  | 54.4 (24.8) |          |

SUV, standardized uptake value; RCB, residual cancer burden; \*two-sided exact p value from Wilcoxon two-sample test.
